# Supplementary material
Source: PubMed Central journal article supplement (PMC9843724)
Supplement: NIHMS1861779-supplement-SI.pdf [file NIHMS1861779-supplement-SI.pdf]

**RF-RDKIT**

| Fold           | AUC         | BACC        | Sens        | Spec        | Kappa       |
|----------------|-------------|-------------|-------------|-------------|-------------|
| 0              | 0.86        | 0.64        | 0.30        | 0.98        | 0.36        |
| 1              | 0.87        | 0.67        | 0.36        | 0.99        | 0.45        |
| 2              | 0.88        | 0.65        | 0.31        | 0.98        | 0.39        |
| 3              | 0.86        | 0.66        | 0.35        | 0.98        | 0.41        |
| 4              | 0.88        | 0.67        | 0.36        | 0.98        | 0.43        |
| <b>Average</b> | <b>0.87</b> | <b>0.66</b> | <b>0.34</b> | <b>0.98</b> | <b>0.41</b> |

**RF-MORGAN**

| Fold           | AUC         | BACC        | Sens        | Spec        | Kappa       |
|----------------|-------------|-------------|-------------|-------------|-------------|
| 0              | 0.83        | 0.63        | 0.28        | 0.98        | 0.35        |
| 1              | 0.84        | 0.63        | 0.28        | 0.98        | 0.35        |
| 2              | 0.84        | 0.62        | 0.25        | 0.98        | 0.32        |
| 3              | 0.85        | 0.64        | 0.30        | 0.99        | 0.40        |
| 4              | 0.86        | 0.64        | 0.29        | 0.99        | 0.39        |
| <b>Average</b> | <b>0.84</b> | <b>0.63</b> | <b>0.28</b> | <b>0.98</b> | <b>0.36</b> |

**XGB-RDKIT**

| Fold           | AUC         | BACC        | Sens        | Spec        | Kappa       |
|----------------|-------------|-------------|-------------|-------------|-------------|
| 0              | 0.87        | 0.65        | 0.32        | 0.97        | 0.37        |
| 1              | 0.87        | 0.68        | 0.39        | 0.97        | 0.45        |
| 2              | 0.88        | 0.67        | 0.37        | 0.97        | 0.43        |
| 3              | 0.87        | 0.69        | 0.40        | 0.97        | 0.46        |
| 4              | 0.88        | 0.68        | 0.39        | 0.98        | 0.45        |
| <b>Average</b> | <b>0.87</b> | <b>0.67</b> | <b>0.37</b> | <b>0.97</b> | <b>0.43</b> |

**XGB-MORGAN**

| Fold           | AUC         | BACC        | Sens        | Spec        | Kappa       |
|----------------|-------------|-------------|-------------|-------------|-------------|
| 0              | 0.84        | 0.66        | 0.33        | 0.98        | 0.41        |
| 1              | 0.85        | 0.64        | 0.30        | 0.98        | 0.38        |
| 2              | 0.86        | 0.64        | 0.30        | 0.98        | 0.37        |
| 3              | 0.85        | 0.65        | 0.32        | 0.98        | 0.41        |
| 4              | 0.85        | 0.69        | 0.39        | 0.99        | 0.49        |
| <b>Average</b> | <b>0.85</b> | <b>0.66</b> | <b>0.33</b> | <b>0.98</b> | <b>0.41</b> |

**DNN-RDKIT**

| Fold           | AUC         | BACC        | Sens        | Spec        | Kappa       |
|----------------|-------------|-------------|-------------|-------------|-------------|
| 0              | 0.81        | 0.57        | 0.14        | 0.99        | 0.21        |
| 1              | 0.78        | 0.62        | 0.25        | 0.98        | 0.31        |
| 2              | 0.86        | 0.67        | 0.38        | 0.97        | 0.43        |
| 3              | 0.82        | 0.58        | 0.16        | 0.99        | 0.23        |
| 4              | 0.82        | 0.64        | 0.29        | 0.99        | 0.37        |
| <b>Average</b> | <b>0.82</b> | <b>0.62</b> | <b>0.24</b> | <b>0.98</b> | <b>0.31</b> |

**DNN-MORGAN**

| Fold | AUC  | BACC | Sens | Spec | Kappa |
|------|------|------|------|------|-------|
| 0    | 0.71 | 0.66 | 0.36 | 0.97 | 0.39  |
| 1    | 0.72 | 0.67 | 0.37 | 0.96 | 0.40  |
| 2    | 0.80 | 0.71 | 0.49 | 0.94 | 0.45  |
| 3    | 0.74 | 0.70 | 0.43 | 0.98 | 0.49  |

|                |      |      |      |      |      |
|----------------|------|------|------|------|------|
| <b>4</b>       | 0.74 | 0.69 | 0.43 | 0.96 | 0.46 |
| <b>Average</b> | 0.74 | 0.69 | 0.42 | 0.96 | 0.44 |

**GCNN**

| <b>Fold</b>    | <b>AUC</b> | <b>BACC</b> | <b>Sens</b> | <b>Spec</b> | <b>Kappa</b> |
|----------------|------------|-------------|-------------|-------------|--------------|
| <b>0</b>       | 0.85       | 0.69        | 0.42        | 0.96        | 0.44         |
| <b>1</b>       | 0.81       | 0.59        | 0.20        | 0.99        | 0.27         |
| <b>2</b>       | 0.88       | 0.63        | 0.28        | 0.97        | 0.33         |
| <b>3</b>       | 0.86       | 0.65        | 0.32        | 0.98        | 0.36         |
| <b>4</b>       | 0.87       | 0.69        | 0.41        | 0.97        | 0.46         |
| <b>Average</b> | 0.85       | 0.65        | 0.33        | 0.97        | 0.37         |

| <b>Model</b> | <b>Full Name</b>                     |
|--------------|--------------------------------------|
| RF           | Random Forest                        |
| XGB          | eXtreme Gradient Boosting or XGBoost |
| DNN          | Deep Neural Network                  |
| GCNN         | Graph Convolutional Neural Network   |



**RF-RDKIT**

| Fold           | AUC  | BACC | Sens | Spec | Kappa |
|----------------|------|------|------|------|-------|
| 0              | 0.86 | 0.76 | 0.62 | 0.91 | 0.55  |
| 1              | 0.85 | 0.78 | 0.64 | 0.92 | 0.60  |
| 2              | 0.82 | 0.73 | 0.56 | 0.90 | 0.48  |
| 3              | 0.85 | 0.73 | 0.53 | 0.92 | 0.49  |
| 4              | 0.86 | 0.75 | 0.60 | 0.91 | 0.53  |
| <b>Average</b> | 0.85 | 0.75 | 0.59 | 0.91 | 0.53  |

**RF-MORGAN**

| Fold           | AUC  | BACC | Sens | Spec | Kappa |
|----------------|------|------|------|------|-------|
| 0              | 0.83 | 0.77 | 0.63 | 0.91 | 0.56  |
| 1              | 0.82 | 0.75 | 0.61 | 0.90 | 0.53  |
| 2              | 0.76 | 0.69 | 0.52 | 0.87 | 0.41  |
| 3              | 0.81 | 0.73 | 0.54 | 0.91 | 0.48  |
| 4              | 0.81 | 0.71 | 0.56 | 0.87 | 0.44  |
| <b>Average</b> | 0.81 | 0.73 | 0.57 | 0.89 | 0.48  |

**XGB-RDKIT**

| Fold           | AUC  | BACC | Sens | Spec | Kappa |
|----------------|------|------|------|------|-------|
| 0              | 0.87 | 0.78 | 0.67 | 0.88 | 0.56  |
| 1              | 0.84 | 0.74 | 0.59 | 0.89 | 0.51  |
| 2              | 0.83 | 0.75 | 0.60 | 0.90 | 0.52  |
| 3              | 0.85 | 0.74 | 0.57 | 0.91 | 0.51  |
| 4              | 0.85 | 0.76 | 0.62 | 0.90 | 0.55  |
| <b>Average</b> | 0.85 | 0.75 | 0.61 | 0.90 | 0.53  |

**XGB-MORGAN**

| Fold           | AUC  | BACC | Sens | Spec | Kappa |
|----------------|------|------|------|------|-------|
| 0              | 0.82 | 0.75 | 0.64 | 0.87 | 0.51  |
| 1              | 0.83 | 0.75 | 0.61 | 0.89 | 0.52  |
| 2              | 0.77 | 0.69 | 0.55 | 0.84 | 0.40  |
| 3              | 0.81 | 0.73 | 0.55 | 0.90 | 0.48  |
| 4              | 0.83 | 0.76 | 0.66 | 0.86 | 0.53  |
| <b>Average</b> | 0.81 | 0.74 | 0.60 | 0.87 | 0.49  |

**DNN-RDKIT**

| Fold           | AUC  | BACC | Sens | Spec | Kappa |
|----------------|------|------|------|------|-------|
| 0              | 0.86 | 0.8  | 0.83 | 0.76 | 0.54  |
| 1              | 0.81 | 0.71 | 0.45 | 0.96 | 0.46  |
| 2              | 0.82 | 0.74 | 0.64 | 0.83 | 0.47  |
| 3              | 0.81 | 0.74 | 0.63 | 0.85 | 0.5   |
| 4              | 0.84 | 0.77 | 0.75 | 0.79 | 0.52  |
| <b>Average</b> | 0.83 | 0.75 | 0.66 | 0.84 | 0.50  |

**DNN-MORGAN**

| Fold | AUC  | BACC | Sens | Spec | Kappa |
|------|------|------|------|------|-------|
| 0    | 0.78 | 0.76 | 0.7  | 0.82 | 0.51  |
| 1    | 0.77 | 0.72 | 0.62 | 0.83 | 0.46  |
| 2    | 0.71 | 0.68 | 0.54 | 0.82 | 0.37  |
| 3    | 0.74 | 0.71 | 0.63 | 0.79 | 0.42  |

|                |      |      |      |      |      |
|----------------|------|------|------|------|------|
| <b>4</b>       | 0.78 | 0.74 | 0.63 | 0.84 | 0.47 |
| <b>Average</b> | 0.76 | 0.72 | 0.62 | 0.82 | 0.45 |

**GCNN**

| <b>Fold</b>    | <b>AUC</b> | <b>BACC</b> | <b>Sens</b> | <b>Spec</b> | <b>Kappa</b> |
|----------------|------------|-------------|-------------|-------------|--------------|
| <b>0</b>       | 0.86       | 0.75        | 0.62        | 0.89        | 0.53         |
| <b>1</b>       | 0.84       | 0.73        | 0.56        | 0.90        | 0.49         |
| <b>2</b>       | 0.83       | 0.75        | 0.61        | 0.89        | 0.51         |
| <b>3</b>       | 0.86       | 0.77        | 0.68        | 0.86        | 0.55         |
| <b>4</b>       | 0.86       | 0.77        | 0.68        | 0.86        | 0.54         |
| <b>Average</b> | 0.85       | 0.75        | 0.63        | 0.88        | 0.52         |
